1                   **Methods for cost-efficient, whole genome**  
2                   **sequencing surveillance for enhanced detection of**  
3                   **outbreaks in a hospital setting**

4  
5                   **1.1 Author names**

6                   *Kady D. Waggle<sup>1,2,4</sup>, Marissa Pacey Griffith<sup>1,2</sup>, Alecia B. Rokes<sup>5,6</sup>, Vatsala Rangachar*  
7                   *Srinivasa<sup>1,2,3</sup>, Deena Ereifej<sup>1,2,3</sup>, Rose Patrick<sup>1,2</sup>, Hunter Coyle<sup>1,2</sup>, Shurmin Chaudhary<sup>1,2</sup>,*  
8                   *Nathan J. Raabe<sup>1,2,3</sup>, Alexander J. Sundermann<sup>1,2</sup>, Vaughn S. Cooper<sup>5,6</sup>, Lee H. Harrison<sup>1,2,3</sup>,*  
9                   *Lora Lee Pless<sup>1,2#</sup>*

10

11                   **ORCID iDs**

12                   Kady D. Waggle  <https://orcid.org/0009-0001-9237-9964>  
13                   Marissa Pacey Griffith  <https://orcid.org/0000-0003-0677-8203>  
14                   Alecia B. Rokes  <https://orcid.org/0000-0001-9496-0296>  
15                   Vatsala Rangachar Srinivasa  <https://orcid.org/0000-0001-7376-8764>  
16                   Deena Ereifej  <https://orcid.org/0009-0002-2984-3784>  
17                   Rose Patrick  <https://orcid.org/0009-0003-3541-5513>  
18                   Hunter Coyle  <https://orcid.org/0009-0006-0463-4168>  
19                   Shurmin Chaudhary  <https://orcid.org/0009-0009-1640-7132>  
20                   Nathan J. Raabe  <https://orcid.org/0000-0002-3258-9003>  
21                   Alexander J. Sundermann  <https://orcid.org/0000-0002-2439-6287>  
22                   Vaughn S. Cooper  <https://orcid.org/0000-0001-7726-0765>  
23                   Lee H. Harrison  <https://orcid.org/0000-0002-3787-2705>

24 Lora Lee Pless  <https://orcid.org/0000-0003-0163-3689>

25

26

## 27 **1.2 Affiliation(s)**

28 <sup>1</sup>Microbial Genomic Epidemiology Laboratory, Center for Genomic Epidemiology,  
29 University of Pittsburgh, 3507 Victoria Street, BST-10 E1000-4A, Pittsburgh,  
30 Pennsylvania 15213, USA.

31 <sup>2</sup>Division of Infectious Diseases, University of Pittsburgh School of Medicine, 3550 Terrace  
32 Street, 818 Scaife Hall, Pittsburgh, Pennsylvania 15261, USA.

33 <sup>3</sup>Department of Epidemiology, School of Public Health, University of Pittsburgh, 130 De  
34 Soto Street, Pittsburgh, Pennsylvania 15261, USA

35 <sup>4</sup>Department of Infectious Diseases, School of Public Health, University of Pittsburgh, 130  
36 De Soto Street, Pittsburgh, Pennsylvania 15261, USA

37 <sup>5</sup>Department of Microbiology and Molecular Genetics, University of Pittsburgh School of  
38 Medicine, Pittsburgh, PA, USA

39 <sup>6</sup>Center for Evolutionary Biology and Medicine, University of Pittsburgh School of Medicine,  
40 Pittsburgh, PA, USA.

41

## 42 **1.3 Corresponding author and email address**

43 #Lora Lee Pless

44 lora.pless@pitt.edu

45 University of Pittsburgh

46 Starzl Biomedical Science Tower

47 200 Lothrop St

48 Pittsburgh, PA 15213

49 **1.4 Keywords**

50 Healthcare-Associated Transmission; Bacteria, Antimicrobial Resistance, Whole Genome

51 Sequencing; Laboratory Methods; Cost Analysis

52

## 53 2. Abstract

54 **Introduction.** Outbreaks of healthcare-associated infections (HAI) result in substantial  
55 patient morbidity and mortality; mitigation efforts by infection prevention teams have the  
56 potential to curb outbreaks and prevent transmission to additional patients. The incorporation  
57 of whole genome sequencing (WGS) surveillance of suspected high-risk pathogens often  
58 identifies outbreaks that are not detected by traditional infection prevention methods and  
59 provides evidence for transmission. Our approach to real-time WGS surveillance, the  
60 Enhanced Detection System for Healthcare-Associated Transmission (EDS-HAT), has 1)  
61 identified serious outbreaks that were otherwise undetected and 2) shown the potential to be  
62 cost saving because HAIs are expensive to treat and WGS has become relatively  
63 inexpensive.

64 **Methods.** We describe a cost-efficient method to perform WGS surveillance and data  
65 analysis of pathogens for hospitals that are interested in incorporating WGS surveillance.  
66 We provide an overview of the weekly workflow of EDS-HAT, discussing both the laboratory  
67 and bioinformatics methods utilized, as well as the costs associated with performing these  
68 methods.

69 **Results.** In an average week at our tertiary healthcare system, we sequenced 48 samples at  
70 a cost of less than \$100 per sample, inclusive of laboratory reagents and staff salaries. The  
71 average turnaround time, from sample collection to data reporting to the infection prevention  
72 and control team, was ten days.

73 **Conclusions.** Our findings demonstrate that performing EDS-HAT in real-time can be both  
74 affordable and time-efficient. Providing such timely information to aid in outbreak  
75 investigations can identify transmission events sooner and thus increase patient safety.

### 76 **3. Impact statement**

77 Whole genome sequencing (WGS) surveillance to confirm or refute suspected outbreaks of  
78 potential healthcare-associated infections (HAI) is a highly effective approach for outbreak  
79 detection. Since November 2021, we have been conducting WGS surveillance in real-time  
80 through a program called the Enhanced Detection System for Hospital-Associated  
81 Transmission (EDS-HAT), to assist our hospital infection prevention and control (IP&C) team  
82 to identify and stop outbreaks. To our knowledge, our laboratory is the only group in the  
83 United States that has successfully implemented real-time WGS surveillance of multiple  
84 pathogens in the hospital setting. Our weekly workflow includes identifying HAI pathogens  
85 and performing WGS, followed by a variety of bioinformatic analyses that include species  
86 confirmation, determination of sequence type, and genetic relatedness comparisons. Based  
87 on this information, transmission clusters are identified, and the electronic health record is  
88 reviewed to determine probable transmission routes. Finally, IP&C implements appropriate  
89 interventions to mitigate the spread of infection. We detail the laboratory and analytical  
90 methods, along with the cost associated for laboratory materials and staff salary, for  
91 successful implementation of WGS surveillance in real-time establishing EDS-HAT as a  
92 unique and effective tool to detect HAI outbreaks.

### 93 **4. Introduction**

94 Healthcare-associated infections (HAIs) are a growing concern in hospital settings and can  
95 be associated with substantial morbidity and mortality. HAIs also impose a significant  
96 economic burden on healthcare systems, costing hospitals an estimated USD\$ 9.6 billion  
97 per year (1,2). Whole genome sequencing (WGS) for HAI organisms can provide insight on  
98 the transmission dynamics in hospital settings (3). Historically, determining the degree of  
99 genomic variation between organisms was accomplished using pulsed field gel

100 electrophoresis (PFGE; 4). Given recent declines in costs and its many advantages, WGS  
101 has emerged as the leading method for determining genetic relatedness between clinical  
102 isolates (5). Reactive WGS is currently the most commonly used method to confirm or refute  
103 the presence of a suspected outbreak. This approach can result in a failure to detect  
104 important outbreaks for a variety of reasons, including outbreaks caused by common  
105 organisms, those not clustering on a single nursing unit, those consisting of a small number  
106 of patients, or those caused by an unsuspected or complex transmission route (6). Reactive  
107 WGS could also falsely identify an outbreak supported by epidemiological methods by  
108 clustering genetically distinct isolates (7). Furthermore, using WGS to obtain information  
109 about the entire genome provides the required data for determining organism phylogeny,  
110 detecting the presence of antimicrobial resistance (AMR) genes and mobile genetic  
111 elements, and identifying rare or novel genetic variants (7,8). The Microbial Genomic  
112 Epidemiology Laboratory (MiGEL) at the University of Pittsburgh developed the Enhanced  
113 Detection System for Healthcare-Associated Transmission (EDS-HAT) to identify outbreaks  
114 of HAIs in real-time using WGS surveillance methods in partnership with the UPMC IP&C  
115 team and the UPMC Clinical Laboratories. EDS-HAT has been operational in real-time at our  
116 institution for over two years (7,9–12). The barriers for most hospital systems for  
117 implementing proactive WGS are cost, lack of technical guidance, and inadequate  
118 infrastructure.

119 In this paper, we describe our methods for WGS, the bioinformatics workflow, and  
120 provide a cost estimate of WGS surveillance, with the goal of providing guidance to hospitals  
121 who wish to implement WGS surveillance.

## 122 5. Theory and Implementation

### 123 Study Setting.

124 MiGEL is a non-Clinical Laboratory Improvement Amendments (CLIA) certified research  
125 laboratory located on the University of Pittsburgh main campus, in Pittsburgh PA, USA.  
126 EDS-HAT was developed and is currently implemented in real time at MiGEL in coordination  
127 with the University of Pittsburgh, UPMC, the UPMC Clinical Laboratory Building (CLB), the  
128 UPMC IP&C team, and Carnegie Mellon University (CMU). UPMC Presbyterian is an adult  
129 tertiary acute care hospital with 758 total beds, 134 critical care beds, and over 400 annual  
130 solid organ transplants. The main campus is UPMC Presbyterian Hospital, also located in  
131 the Oakland neighborhood of Pittsburgh, PA, adjacent to the University of Pittsburgh main  
132 campus and CMU. The University of Pittsburgh Institutional Review Board provided ethics  
133 approval for EDS-HAT (Protocol: STUDY21040126).

### 134 Clinical Specimen Collection.

135 **Isolate Inclusion Criteria.** A list of select, high-concern bacterial pathogens was generated  
136 twice per week using Theradoc (5.4.0.HF1.102, Pittsburgh, PA; Fig 1A). Pathogens of  
137 interest include: extended-spectrum B-lactamase-producing (ESBL) *Escherichia coli*, ESBL  
138 *Enterobacter* species, *Acinetobacter* species, *Pseudomonas* species, *Klebsiella* species,  
139 *Stenotrophomonas* species, *Serratia* species, *Burkholderia* species, *Providencia* species,  
140 *Proteus* species, *Citrobacter* species, vancomycin-resistant *Enterococcus* (VRE), methicillin-  
141 resistant *Staphylococcus aureus* (MRSA), and *Clostridioides difficile*. EDS-HAT isolate  
142 inclusion criteria included patients who have been in the hospital for three or more days  
143 and/or had a previous hospital exposure during the 30-days prior to culture (7). For this  
144 study, we described the samples and methods utilized during a one-year period of time of  
145 performing real-time EDS-HAT (March 2022-March 2023).

146 **Isolate Collection.** Bacterial samples were collected by MiGEL twice per week at the UPMC  
147 CLB from pure cultures isolated from clinical specimens that were prompted by clinician  
148 suspicion of infection (Fig 1.B1). To ensure availability of the isolates for sequencing, CLB  
149 technologists subcultured all gram-negative isolates from aerobic bacterial cultures onto  
150 nutrient agar slants. We identified the gram-negative isolate slants of interest from the CLB,  
151 and then isolates of interest were subcultured to Trypticase Soy Agar with 5% sheep blood  
152 (BAP) plates (BD, Franklin Lakes, NJ), transported to MiGEL, and incubated at 37°C  
153 overnight in the presence of 5% CO<sub>2</sub>. The gram-positive isolates from the CLB were  
154 transferred from one BAP to another and then transported and incubated at MiGEL following  
155 the same procedure. The next day, sample information was imported into the MiGEL  
156 database, and a de-identified specimen ID was generated for each sample.

157 ***Clostridioides difficile* collection and culture.** In contrast to the methods described for the  
158 above organisms that were isolated as pure cultures, we collected and cultured clinical stool  
159 specimens that tested positive for *C. difficile* by culture-independent diagnostic testing (13).  
160 This organism is anaerobic; thus, we performed the following protocol to isolate this  
161 organism directly from the clinical stool specimens. In a biosafety cabinet, each stool sample  
162 was subcultured onto cycloserine-cefoxitin-mannitol-agar with taurocholate and lysozyme  
163 (CCMA-TAL) plates to select for *C. difficile* growth. Plates were transferred into a Coy  
164 anaerobic chamber (Coy Laboratory Products, Grass Lake, MI) and incubated at 37°C for 48  
165 hours. Colonies of *C. difficile* were passaged to a second CCMA plate and incubated at  
166 37°C in the anaerobic chamber for an additional 24-48 hours. Isolates were confirmed as *C.*  
167 *difficile* by testing for the production of L-Proline aminopeptidase using a PRO Disc test  
168 (Remel, San Diego, CA; Fig1.B2).



## 169 **Sample Preparation and DNA Extraction**

170 To begin sample preparation for WGS, microcentrifuge tubes containing 750  $\mu$ L phosphate  
171 buffered saline (PBS) were inoculated with a quarter-portion of a 10  $\mu$ L loop of bacteria (a  
172 half-portion was used for *C. difficile*) from the BAP or CCMA plate. The tubes were  
173 centrifuged at  $6.0 \times g$  for 10 minutes to generate a pellet, and the supernatant was removed  
174 using a P1000 pipette (Fig 1C). For samples not proceeding immediately to extractions, the  
175 pellets were stored at  $-20^{\circ}\text{C}$ . Isolate stocks for long-term storage for all bacterial isolates  
176 (including *C. difficile*) were prepared by inoculating a 10  $\mu$ L loop of bacteria into cryovials  
177 containing 1 mL of nutrient broth mixed with 20% glycerol and then stored at  $-80^{\circ}\text{C}$ .

178 The bacterial pellets were re-suspended in 500  $\mu$ L PBS prior to extraction. DNA was  
179 extracted using the MagMAX DNA Multi-Sample Ultra 2.0 extraction kit on the King Fisher  
180 Apex (Thermo Fisher Scientific, Waltham, MA) per manufacturer's instructions (Fig 1D).  
181 Briefly, this procedure isolates and purifies nucleic acids using magnetic bead-based  
182 technology. DNA was eluted in 100  $\mu$ L of elution buffer supplied by the kit and then  
183 quantified using a Qubit broad range dsDNA kit (Life Technologies, Carlsbad, CA). Samples  
184 with a concentration  $\geq 3.5\text{ng}/\mu\text{L}$  were considered for WGS. For samples that did not meet this  
185 criterion, DNA was extracted again.

## 186 **WGS Library Preparation**

187 DNA libraries were prepared on an epMotion 5075t (Eppendorf, Hamburg, Germany) liquid  
188 handler using a DNA Prep (M) Tagmentation kit (Illumina, San Diego, CA), utilizing half-  
189 volume reactions for BLT/TB1 and EPM reagents (Fig 1E). A unique 10-mer index adapter  
190 sequence was ligated to each sample (IDT, Coralville, IA). Briefly, the DNA Prep protocol  
191 uses bead-linked transposomes to tagment and amplify the adapter-tagged DNA segments.  
192 Eight individual libraries were pooled together by combining 5  $\mu$ L per library into a single  
193 tube. Pooled libraries were quantified using a Qubit high sensitivity dsDNA kit. The library

194 pool was normalized to 4 nM with resuspension buffer (RSB). Additional pools were  
195 combined using equimolar concentration into a single pool. The distribution of the fragment  
196 sizes for the sequencing pool was assessed using an Agilent Tapestation D5000 screen  
197 tape and reagents per manufacturer's protocol (Agilent Technologies, Santa Clara, CA).

## 198 **Whole Genome Sequencing**

199 DNA libraries were sequenced weekly using an Illumina MiSeq ( $\leq 32$  samples on a v3, 600  
200 cycle kit) or NextSeq550 ( $> 32$  samples on a v2.5, 300 cycle kit) platform (Fig 1F). The DNA  
201 library was denatured using 0.2N NaOH and spiked with 1% PhiX to increase diversity on  
202 the flow cell. The DNA library was diluted, using the average library length, to the final  
203 loading concentration of 16 pM for the MiSeq or 1.5-1.6 pM for the NextSeq550. A  
204 commercial lab was used for sequencing in rare cases where personnel were unavailable for  
205 in-house sequencing. For these occasions, DNA was extracted and sent for same-day  
206 delivery using a local medical courier service, followed by library preparation and sequencing  
207 at the commercial lab. For sequencing using any of the options described, DNA extraction  
208 and library preparation were performed using automated methods; however, it was possible  
209 to perform all steps manually.

## 210 **Bioinformatics and Data Analysis**

211 **Sequencing Data Quality Control (QC).** We have developed a real-time bioinformatics  
212 pipeline that is executed once per week as a single command written in the programming  
213 language Python. This customized pipeline is one of four commands that are executed on  
214 the new samples, as well as previously sequenced genomes. These commands include: 1)  
215 data download from the BaseSpace Sequence Hub v7.18.0 (Illumina); 2) sample  
216 demultiplexing; 3) file transfer into individual directories; and 4) real-time bioinformatics  
217 pipeline execution. Specifically, we begin by converting and demultiplexing the base call files  
218 using Illumina bcl2fastq (v2.20) software. WGS reads were assembled using Unicycler

219 v0.5.0 and then annotated using Prokka v1.14 (14). Multilocus sequence types (STs) were  
220 assigned using PubMLST typing schemes for all organisms with the exception of *Serratia*  
221 *spp.* and *Providencia spp.*, which do not have ST schemes (mlst v2.11; 15). Reads were  
222 mapped using Kraken2 with the Kraken standard database to determine the most prevalent  
223 species (16). Isolates passed QC if 1) the most prevalent species by Kraken2 was the  
224 expected organism, 2) the assembly length was within 20% of the expected genome length,  
225 3) the assembly was  $\leq 350$  contigs, and 4) there was at least 35 $\times$  depth (Fig 1G).

226 **Determining Infection Clusters and Downstream Applications.** Pairwise single  
227 nucleotide polymorphisms (SNPs) between all real-time EDS-HAT isolates of the same  
228 species were determined using one of two programs (Fig 1H). i) Pairwise core genome  
229 SNPs (cgSNPs) were determined using Snippy v4.3.0, a reference-based method, for  
230 isolates with the same ST (17). SNP distances were calculated from the core alignment  
231 using 'snp-dists' (18). ii) SKA v1.0, a reference-free method, was used to calculate SNP  
232 distances using the 'ska distance' command for isolates of the same species (19). We  
233 selected the minimum SNP distance for each pairwise comparison quantified by Snippy or  
234 SKA to determine clusters of genetically similar isolates. These genetically similar clusters  
235 were defined using hierarchical clustering with average linkage and a cutoff of  $\leq 15$  SNPs for  
236 all species except *C. difficile*, for which a cutoff of  $\leq 2$  SNPs was used (Fig 1H;  
237 <https://scipy.org/>). The electronic health records for patients with genetically similar isolates  
238 were reviewed to determine potential epidemiological links. This information was then  
239 communicated to the hospital IP&C team, which implemented targeted mitigation measures  
240 when possible. See Supplementary Figure 1 for real-time bioinformatics pipeline.

## 241 **Cost Analysis**

242 A cost estimate for EDS-HAT real-time genomic surveillance methods was determined in  
243 2023 US dollars and included the cost of personnel, reagents, and supplies, and was

244 analyzed comparatively for each sequencing platform used by MiGEL (Supplementary Table  
245 1). Non-fringe personnel costs (salary) were determined using the average pay scale of  
246 Laboratory Technician III (90% effort) and Bioinformatics Research Analyst II (50% effort)  
247 positions at UPMC, Pittsburgh, PA in 2023. Reagent and supply costs were determined  
248 using manufacturer pricing (data accessed: December 1, 2023).

## 249 **6. Results**

### 250 **Weekly Sequencing Runs**

251 From March 2022 to March 2023, MiGEL collected and sequenced 2,070 bacterial isolates  
252 (with an average of 48 isolates per week) as part of real-time EDS-HAT. The most  
253 commonly sequenced organism was *Pseudomonas aeruginosa* (617 genomes) and the  
254 least sequenced was *Burkholderia sp.* (11 genomes; Table 1). To determine which platform  
255 was best suited for weekly sequencing, we considered the count of organisms and the  
256 average genome size. The weekly average genome size was 4.85 Mbp, roughly equating to  
257 a maximum of 37 or 98 samples on the MiSeq or NextSeq flow cells, respectively, to achieve  
258 a minimum target of 80x coverage. When sequencing pools of organisms with smaller  
259 average genome sizes, a greater number of isolates could be appropriately accommodated  
260 per flow cell without compromising run quality or per organism coverage data (Figure 2).  
261 Based on the MiGEL average genome size and to maximize cost efficiency, runs containing  
262 a range of 32-40 samples were sequenced on the MiSeq platform, and runs containing > 40  
263 samples were sequenced on the NextSeq550 platform. During this study, 17 runs were  
264 performed on the MiSeq platform, and 28 runs were performed on the NextSeq550 platform.  
265 For an average run of 48 samples on the NextSeq550, MiGEL observed a maximum output  
266 of 52 Gb of data and an average of 100 million reads (Supplementary Table 2). The average  
267 turnaround time to complete the EDS-HAT workflow from sample collection by MiGEL to  
268 bioinformatic analysis using either platform for sequencing was approximately 10 days, with

269 an average WGS instrument run time of 25 hours (Supplementary Table 2). The turnaround  
270 time for using a commercial lab was approximately two weeks or less.

## 271 **Cost Analysis**

272 The cost to run real-time EDS-HAT weekly was categorized into sample processing, DNA  
273 extraction and quantification, library preparation, and flow cell cost (Table 2). The lowest cost  
274 per sample (\$48) was achieved when the maximum number of samples (n=96) were  
275 sequenced using the NextSeq550 platform. Costs ranged from \$48 to \$83 per sample,  
276 dependent on platform and sample counts. There was an inverse relationship between the  
277 number of samples sequenced and flow cell cost as per sample costs significantly  
278 decreased when a greater number of samples were multiplexed on the appropriate flow cell.  
279 The gray dashed line in Figure 3 shows the cost to sequence 40 samples using all  
280 sequencing options, with the MiSeq having the lowest cost and commercial lab having the  
281 highest. The estimated weekly cost of personnel, based on the pre-tax salaries for one lab  
282 technician and one bioinformatician based on percent efforts, totaled \$1,077. When all costs  
283 were considered, the cost to run EDS-HAT on an average week totaled \$4,293 (min \$3,626  
284 – max \$4,758) or \$223,236 per year (min \$188,552 – max \$247,416).

## 285 **7. Discussion**

286 In this study, we detailed an efficient laboratory workflow, our approach for bioinformatics  
287 analyses, and estimated the cost associated with implementing real-time WGS surveillance  
288 for pathogenic bacteria in a hospital system that was designed to detect otherwise  
289 unrecognized hospital outbreaks. EDS-HAT began in 2016 as a retrospective study (7) and,  
290 once we demonstrated the superiority of the system over traditional approaches, transitioned  
291 in November 2021 to a real-time workflow, subsequent bioinformatic analyses, and reporting  
292 of results to the hospital IP&C team. To our knowledge, UPMC is the only hospital system in

293 the US that is actively performing prospective WGS surveillance methods for multiple  
294 pathogens in real time. By doing so, our hospital system has dramatically changed the way  
295 outbreaks are being detected.

296 We provide details about our methods for a one-year timeframe, after our initial  
297 optimization period, beginning in March 2022. We determined that the per sample cost for  
298 WGS ranged from \$48 to \$83, with an average of \$65. Furthermore, with the addition of staff  
299 salaries, the mean weekly cost for an average week of real-time sequencing was \$4,293  
300 ( $N=48$  samples). This cost of real-time WGS is lower compared to prior studies (20,21). Our  
301 lower cost was achieved, in part, by increasing sample counts per flow cell while utilizing the  
302 appropriate instrument, using half-volumes of reagents for some stages of library  
303 preparation, and an overall decline in sequencing costs.

304 With our quick turnaround time from the day the sample is collected by MiGEL, we have  
305 identified ongoing outbreaks that serve as a guide for the IP&C team to implement infection  
306 prevention interventions. We previously showed that there was an estimated cost savings of  
307 \$96,204–\$346,266 per year by implementing a real-time WGS surveillance system, which  
308 was based on an average cost of \$86 for sample preparation and sequencing (adjusted for  
309 inflation to 2023 USD; 22). We optimized the average per isolate cost of sample preparation  
310 and sequencing from \$74 on the MiSeq platform (SD, \$3.30) to \$60 on the NextSeq platform  
311 (SD, \$6.40), achieving even greater cost savings per year. 2/16/2024 1:00:00 PM  
312 importantly, stopping transmission events quickly at the first sign of an outbreak cluster has  
313 the potential to reduce further spread of the infection and thus reduce patient morbidity and  
314 mortality.

315 The foremost concern of hospital systems with implementing programs like EDS-HAT is  
316 cost, with the vast majority of interested parties assuming that there is a large expense  
317 associated with real-time sequencing surveillance. While this was true years ago, the cost of

318 sequencing has decreased over time (23). In addition, the laboratory and bioinformatics  
319 methods have become more streamlined, automatable, and efficient. Furthermore, the cost  
320 of treating preventable hospital infections is high, and, in fact, EDS-HAT has been shown to  
321 be cost saving. Taken together, these facts and the evidence that this approach can identify  
322 important, otherwise-undetected outbreaks, suggest that WGS surveillance should  
323 eventually become standard practice in hospitals.

324 To accompany our methods, we computed the cost per sample, which accounts for staff  
325 salaries, to be \$91 on average (range \$62-\$119), and is specific for the greater Pittsburgh  
326 region in Pennsylvania, USA and is likely to be different at other locations. This fact is  
327 summarized by Price and colleagues, who find the cost to perform WGS varies by country  
328 and city (20). For example, Price (20) converted the cost per sample from prior studies to  
329 2023 USD and showed the per sample cost of sequencing ranged from approximately \$72-  
330 \$470 for the US and Italy, respectively. In this study, we determined our average per sample  
331 cost (without considering staff salaries, for comparison) was \$65 per sample. The primary  
332 factor in determining this cost estimate was sample count per run and average organism  
333 genome size. For reference, we provide the maximum number of samples that can be  
334 sequenced on either MiSeq or NextSeq platforms by organism, considering genome size,  
335 along with the average genome size sequenced over one year by MiGEL (Figure 2). In  
336 addition, we show in Figure 3 that a sample count of 40 is an appropriate cutoff to decide  
337 which machine to use for sample sequencing, while maintaining sufficient genome coverage.  
338 Generally, we find sequencing more samples at a time reduced the cost of sequencing per  
339 sample, with the exception of utilizing a commercial lab. While the commercial lab offered a  
340 discounted price once the sample count reached 48, we find the fixed price was overall more  
341 costly than performing in-house sequencing. Furthermore, we find a decrease in sequencing  
342 costs over time. MiGEL estimated a \$72 average per sample cost in 2021, which we show is

343 lower in cost by \$7 during our study period (March 8, 2022 to March 9, 2023; average cost is  
344 \$65).

345 We note limitations with this study. First, the costs for reagents and supplies presented  
346 in this manuscript represent discounted pricing provided to our university from some  
347 manufacturers. Other institutions may have different discounted pricing or pay manufacturers  
348 rates, which will alter the costs described in our methods. Second, MiGEL benefits from the  
349 use of robotic instruments for nucleic acid extractions and library preparation, which can help  
350 save time and decrease pipetting errors on the bench. Some institutions may not have such  
351 instruments available and will need to accommodate the laboratory methods we described  
352 accordingly; however, we do not think this represents a significant detriment to the process.  
353 Third, we only considered Illumina-based technology for this study. Other short-read  
354 sequencing technologies or long-read sequencing were not assessed. Fourth, we have  
355 demonstrated the cost-efficiency at an academic, tertiary hospital system. These estimates  
356 are likely not reflective of a healthcare system located at a smaller locale.

357 In conclusion, we have shown that a real-time WGS surveillance program is both  
358 feasible and affordable. Healthcare institutions wishing to do the same could potentially  
359 discover outbreaks that would otherwise be missed. Further adoption of this approach has  
360 the potential to significantly enhance patient safety.



361

## 362 8. Tables

### 363 Table 1.

364 EDS-HAT Bacterial genome sizes and number of each organism that has been sequenced  
365 by MiGEL (March 8, 2022 to March 9, 2023).

| Organism                        | Genome Size (Mb) | Count Sequenced by MiGEL |
|---------------------------------|------------------|--------------------------|
| <i>Acinetobacter species</i>    | 3.9              | 58                       |
| <i>Burkholderia species</i>     | 7.2              | 11                       |
| <i>Clostridioides difficile</i> | 4.2              | 67                       |
| <i>Citrobacter species</i>      | 4.7              | 46                       |
| <i>Enterobacter cloacae</i>     | 5.3              | 51                       |
| <i>Escherichia coli</i>         | 5.3              | 152                      |
| <i>Klebsiella oxytoca</i>       | 5.9              | 28                       |
| <i>Klebsiella pneumoniae</i>    | 5.3              | 115                      |
| MRSA                            | 2.9              | 306                      |
| <i>Providencia species</i>      | 4.5              | 28                       |
| <i>Pseudomonas species</i>      | 6.6              | 643                      |
| <i>Serratia species</i>         | 5.2              | 154                      |
| <i>Stenotrophomonas species</i> | 4.8              | 112                      |
| VRE                             | 2.9              | 127                      |
| <i>Proteus species</i>          | 4.06             | 269                      |

366

### 367 Table 2. Cost Estimates

| Method | MiSeq cost per sample | NextSeq cost per sample | Commercial Sequencing Cost |
|--------|-----------------------|-------------------------|----------------------------|
|--------|-----------------------|-------------------------|----------------------------|

|                                            | (32 samples) | (48 samples) | (96 samples) | (any # samples) |
|--------------------------------------------|--------------|--------------|--------------|-----------------|
| <b>Sample Processing</b>                   | \$2.06       | \$2.06       | \$2.06       | \$2.06          |
| <b>DNA Extraction &amp; Quantification</b> | \$7.15       | \$7.15       | \$7.15       | \$7.15          |
| <b>Library Preparation</b>                 | \$25.90      | \$24.96      | \$24.02      | -               |
| <b>Sequencing Kit (Flow Cell)</b>          | \$49.16      | \$37.29      | \$18.65      | \$75            |
| <b>TOTAL COST PER SAMPLE</b>               | \$84.27      | \$71.46      | \$51.88      | \$84.21         |

368

369

## 370 **9. Author statements**

### 371 **9.1 Conflicts of interest**

372 The authors declare that there are no conflicts of interest, including financial interests,  
373 activities, relationships, and affiliations.

### 374 **9.2 Funding information**

375 This work was supported by the National Institutes of Health (grant numbers R01AI127472  
376 and R21AI109459).

### 377 **9.3 Ethical approval**

378 The University of Pittsburgh institutional review board provided ethics approval for this study.

### 379 **9.4 Acknowledgements**

380 The authors would like to thank SeqCenter for their assistance with WGS. We thank the  
381 leaders and staff of the UPMC Clinical Laboratories, especially Tung Phan, MD, PhD,  
382 D(ABMM), and Hannah Creager PhD, D(ABMM) and all members of the UPMC

383 Presbyterian/Shadyside Infection Prevention & Control Team, especially Graham Snyder,  
384 MD, Ashley Ayres, MBA, CIC for their continued support. This publication made use of the  
385 PubMLST website (<https://pubmlst.org/>) developed by Keith Jolley (Jolley & Maiden 2010,  
386 BMC Bioinformatics, 11:595) and sited at the University of Oxford. The development of that  
387 website was funded by the Wellcome Trust.

## 388 10. References

- 389 1. Scott RD. The Direct medical costs of healthcare-associated infections in U.S. hospitals  
390 and the benefits of prevention [Internet]. 2009. 16 p. Available from:  
391 <https://stacks.cdc.gov/view/cdc/11550>
- 392 2. Alioth Finance. \$6,500,000,000 in 2007 → 2023 | Inflation Calculator [Internet]. 2023.  
393 Available from: <https://www.officialdata.org/us/inflation/2007?amount=6500000000>
- 394 3. Mustapha MM, Srinivasa VR, Griffith MP, Cho ST, Evans DR, Waggle K, et al. Genomic  
395 Diversity of Hospital-Acquired Infections Revealed through Prospective Whole-Genome  
396 Sequencing-Based Surveillance. *mSystems*. 2022 Jun 28;7(3):e0138421.
- 397 4. Neoh HM, Tan XE, Sapri HF, Tan TL. Pulsed-field gel electrophoresis (PFGE): A review  
398 of the “gold standard” for bacteria typing and current alternatives. *Infect Genet Evol J Mol  
399 Epidemiol Evol Genet Infect Dis*. 2019 Oct;74:103935.
- 400 5. Quainoo S, Coolen JPM, van Hijum SAFT, Huynen MA, Melchers WJG, van Schaik W, et  
401 al. Whole-Genome Sequencing of Bacterial Pathogens: the Future of Nosocomial  
402 Outbreak Analysis. *Clin Microbiol Rev*. 2017 Oct;30(4):1015–63.
- 403 6. Sundermann AJ, Babiker A, Marsh JW, Shutt KA, Mustapha MM, Pasculle AW, et al.  
404 Outbreak of Vancomycin-resistant *Enterococcus faecium* in Interventional Radiology:  
405 Detection Through Whole-genome Sequencing-based Surveillance. *Clin Infect Dis Off  
406 Publ Infect Dis Soc Am*. 2020 May 23;70(11):2336–43.
- 407 7. Sundermann AJ, Chen J, Kumar P, Ayres AM, Cho ST, Ezeonwuka C, et al. Whole-  
408 Genome Sequencing Surveillance and Machine Learning of the Electronic Health Record  
409 for Enhanced Healthcare Outbreak Detection. *Clin Infect Dis*. 2022 Aug 31;75(3):476–82.
- 410 8. Didelot X, Bowden R, Wilson DJ, Peto TEA, Crook DW. Transforming clinical  
411 microbiology with bacterial genome sequencing. *Nat Rev Genet*. 2012 Sep;13(9):601–12.
- 412 9. Sundermann AJ, Rangachar Srinivasa V, Mills EG, Griffith MP, Waggle KD, Ayres AM, et  
413 al. Two Artificial Tears Outbreak-Associated Cases of Extensively Drug-Resistant  
414 *Pseudomonas aeruginosa* Detected Through Whole Genome Sequencing-Based  
415 Surveillance. *J Infect Dis*. 2023 Sep 13;jiad318.

- 416 10. Raabe NJ, Valek AL, Griffith MP, Mills E, Waggle K, Srinivasa VR, et al. Genomic  
417 Epidemiologic Investigation of a Multispecies Hospital Outbreak of NDM-5-Producing  
418 Enterobacteriales Infections. *MedRxiv Prepr Serv Health Sci*. 2023 Sep  
419 1;2023.08.31.23294545.
- 420 11. Sundermann AJ, Griffith M, Rangachar Srinivasa V, Ereifej D, Waggle K, Van Tyne  
421 D, et al. Environmental contamination of postmortem blood cultures detected by whole-  
422 genome sequencing surveillance. *Infect Control Hosp Epidemiol*. 2023 Aug 24;1–2.
- 423 12. Sundermann AJ, Chen J, Miller JK, Saul MI, Shutt KA, Griffith MP, et al. Outbreak of  
424 *Pseudomonas aeruginosa* Infections from a Contaminated Gastroscope Detected by  
425 Whole Genome Sequencing Surveillance. *Clin Infect Dis Off Publ Infect Dis Soc Am*.  
426 2021 Aug 2;73(3):e638–42.
- 427 13. Crobach MJT, Planche T, Eckert C, Barbut F, Terveer EM, Dekkers OM, et al.  
428 European Society of Clinical Microbiology and Infectious Diseases: update of the  
429 diagnostic guidance document for *Clostridium difficile* infection. *Clin Microbiol Infect Off*  
430 *Publ Eur Soc Clin Microbiol Infect Dis*. 2016 Aug;22 Suppl 4:S63-81.
- 431 14. Seemann T. Prokka: rapid prokaryotic genome annotation. *Bioinforma Oxf Engl*.  
432 2014 Jul 15;30(14):2068–9.
- 433 15. Seemann T. mlst [Internet]. Available from: <https://github.com/tseemann/mlst>
- 434 16. Wood DE, Lu J, Langmead B. Improved metagenomic analysis with Kraken 2.  
435 *Genome Biol*. 2019 Nov 28;20(1):257.
- 436 17. Seemann T. Snippy [Internet]. 2023. Available from:  
437 <https://github.com/tseemann/snippy>
- 438 18. Seemann T. snp-dists [Internet]. 2023. Available from:  
439 <https://github.com/tseemann/snp-dists>
- 440 19. Harris SR. SKA: Split Kmer Analysis Toolkit for Bacterial Genomic Epidemiology  
441 [Internet]. *Genomics*; 2018 Oct [cited 2023 Oct 4]. Available from:  
442 <http://biorxiv.org/lookup/doi/10.1101/453142>
- 443 20. Price V, Ngwira LG, Lewis JM, Baker KS, Peacock SJ, Jauneikaite E, et al. A  
444 systematic review of economic evaluations of whole-genome sequencing for the  
445 surveillance of bacterial pathogens. *Microb Genomics*. 2023 Feb;9(2):mgen000947.
- 446 21. Havelaar AH, Kirk MD, Torgerson PR, Gibb HJ, Hald T, Lake RJ, et al. World Health  
447 Organization Global Estimates and Regional Comparisons of the Burden of Foodborne  
448 Disease in 2010. *PLoS Med*. 2015 Dec;12(12):e1001923.
- 449 22. Kumar P, Sundermann AJ, Martin EM, Snyder GM, Marsh JW, Harrison LH, et al.  
450 Method for Economic Evaluation of Bacterial Whole Genome Sequencing Surveillance

- 451 Compared to Standard of Care in Detecting Hospital Outbreaks. Clin Infect Dis. 2021 Jul  
452 1;73(1):e9–18.
- 453 23. Wetterstrand K. DNA Sequencing Costs: Data from the NHGRI Genome Sequencing  
454 Program (GSP) Available at: [www.genome.gov/sequencingcostsdata](http://www.genome.gov/sequencingcostsdata).
- 455

A. Collect List Generation

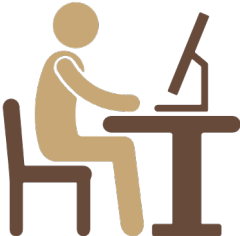

B1. Bacterial Isolate Collection

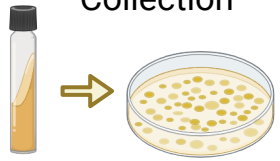

B2. *C. difficile* Collection and Isolation

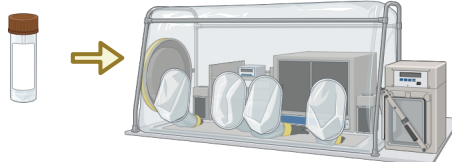

C. Sample Processing

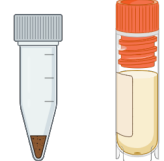

D. DNA Extraction

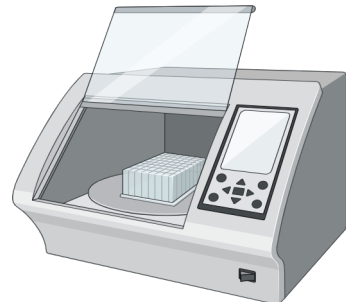

E. Library Preparation

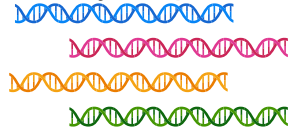

F. Whole Genome Sequencing

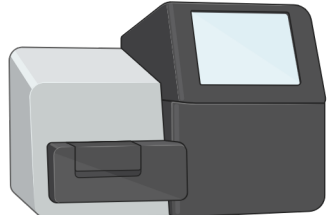

G. Bacterial Species and ST determined

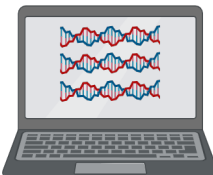

H. Determination of SNPs

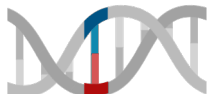

I. Determination of Transmission Clusters

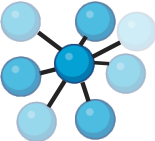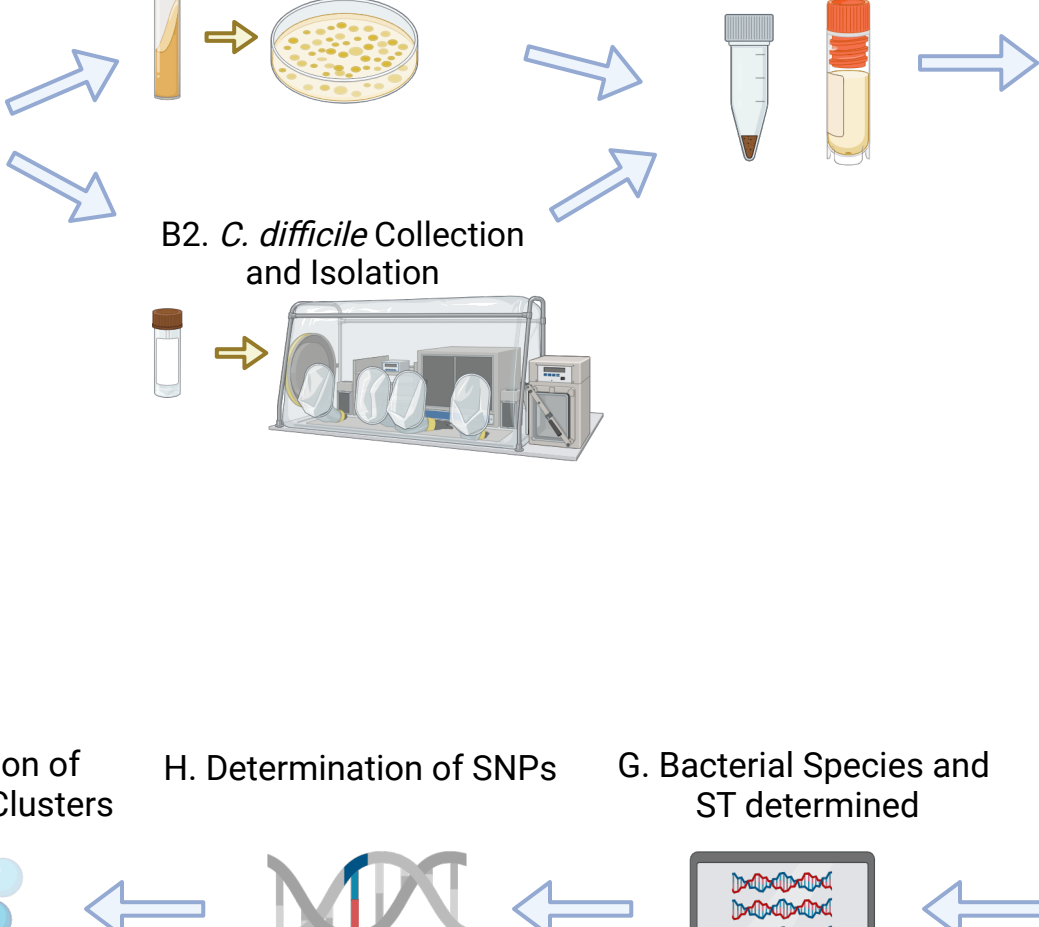

# Maximum Sample Counts

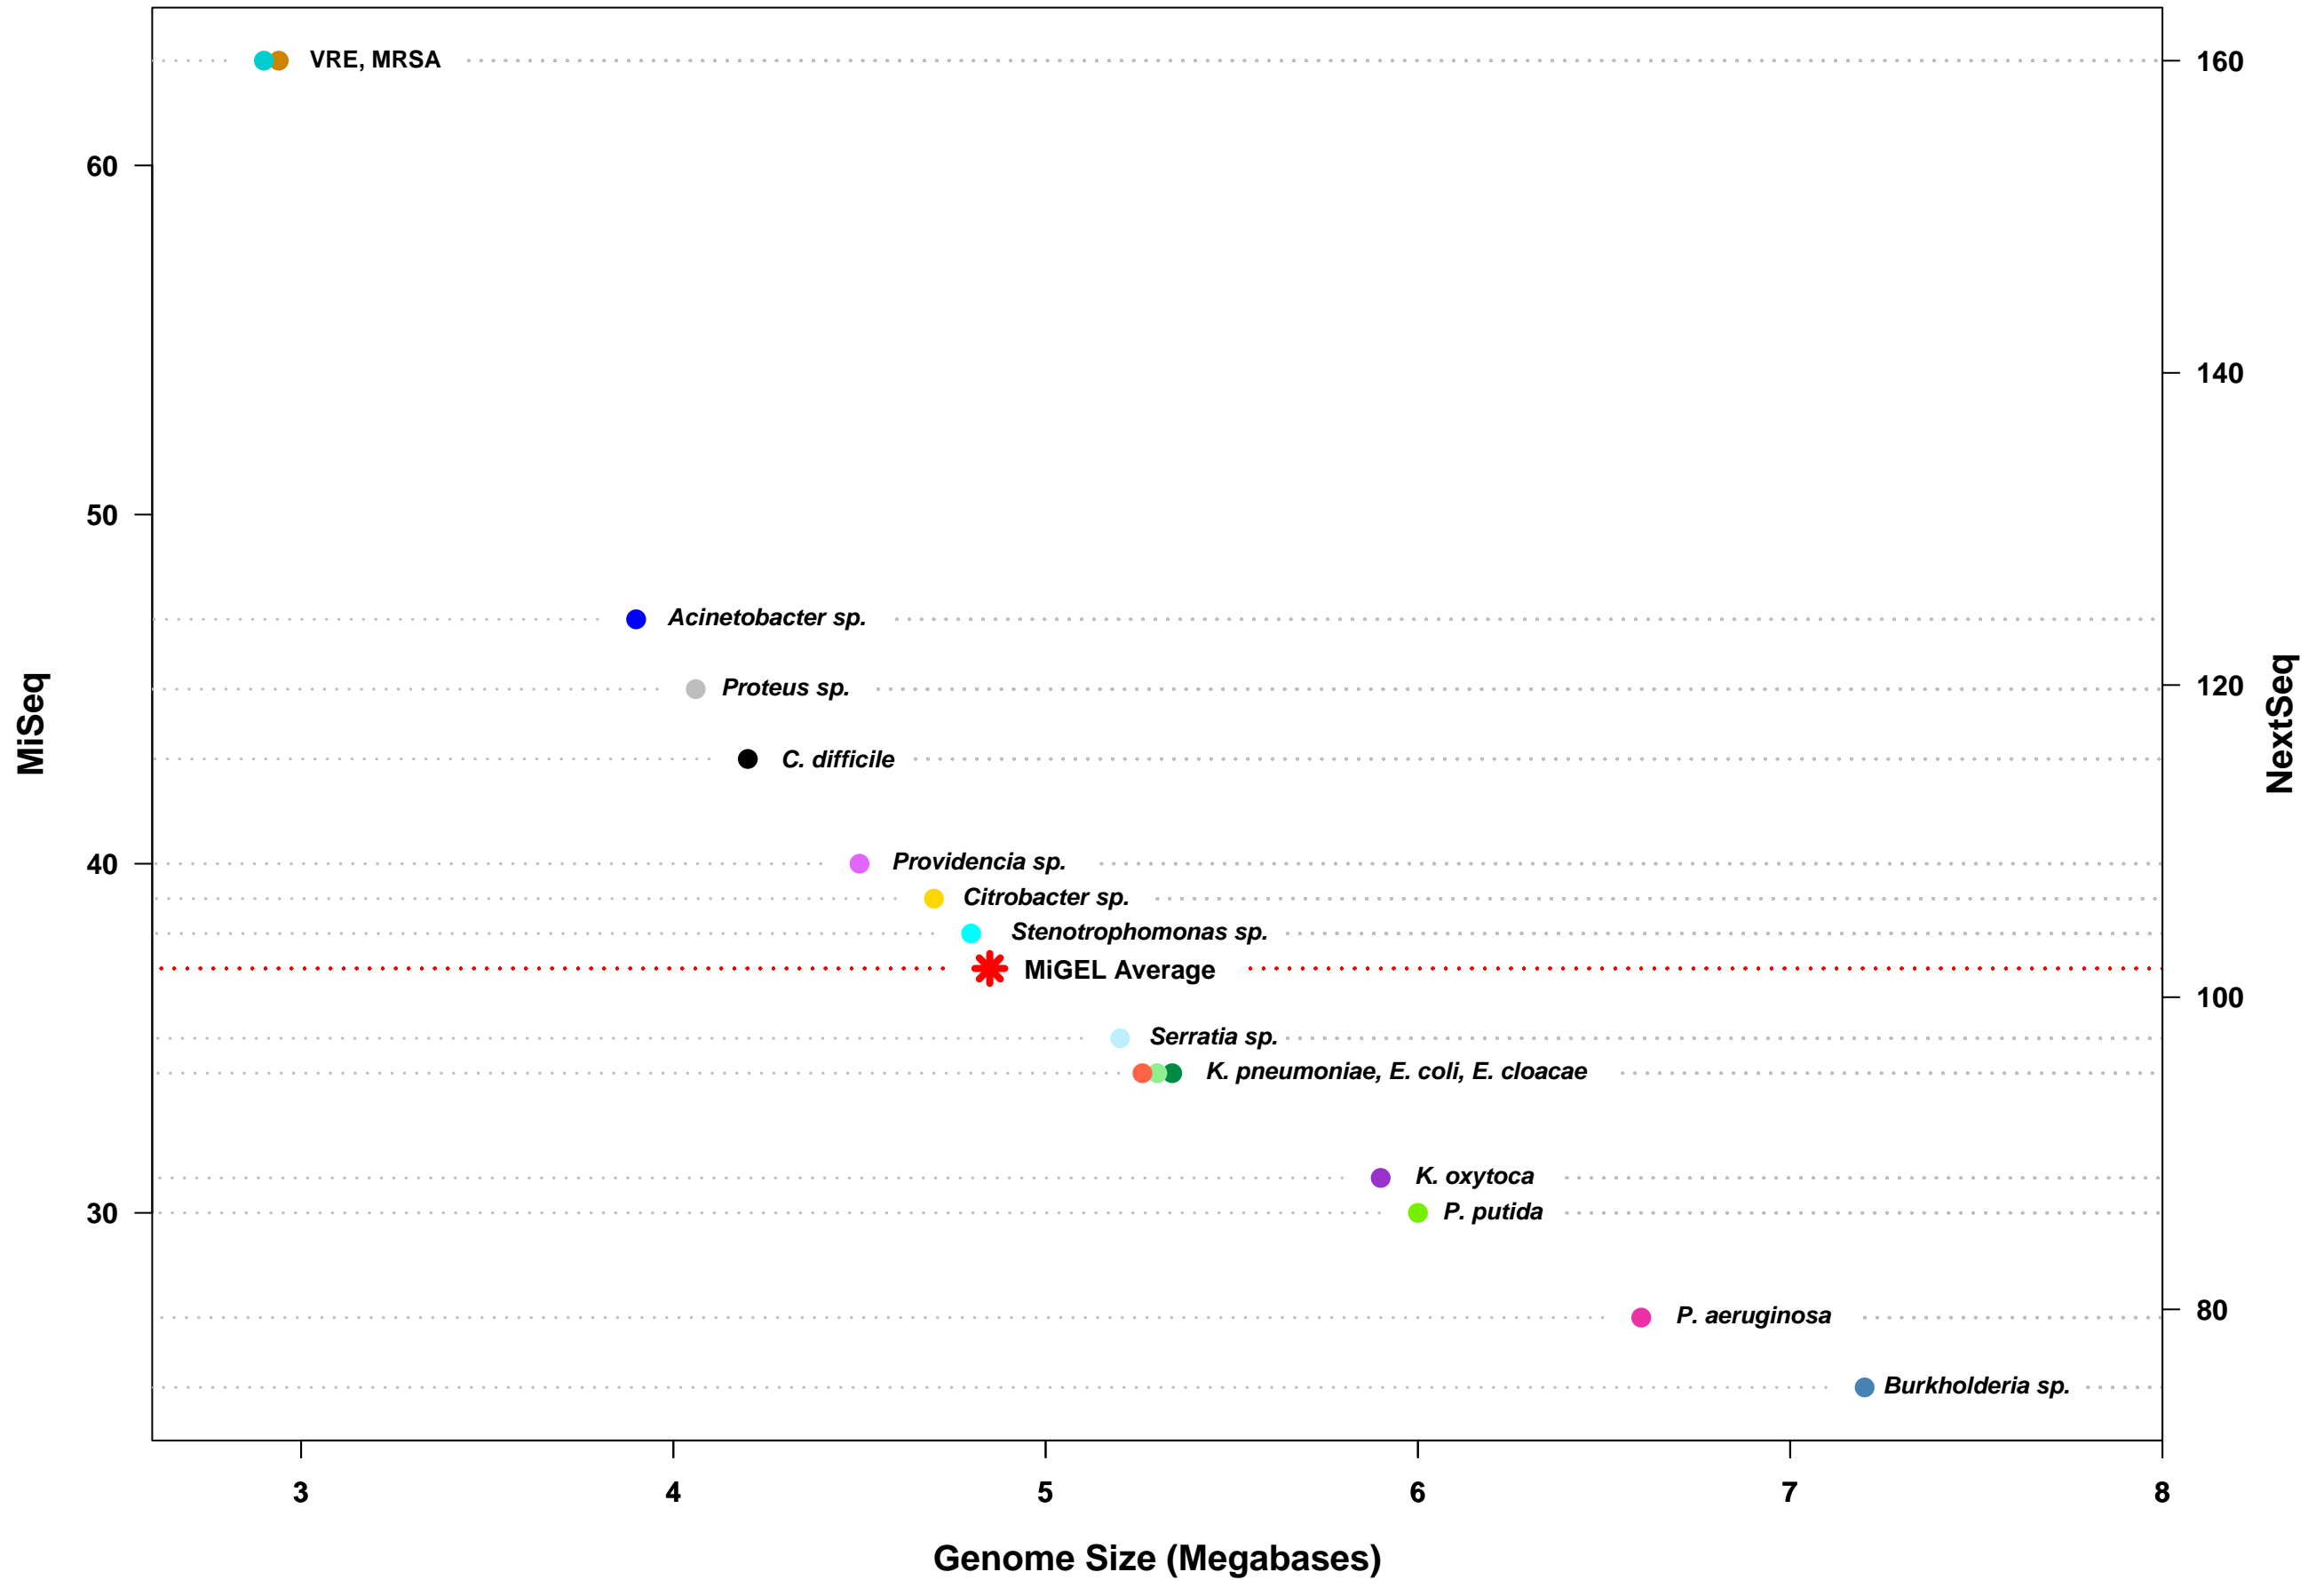

Cost per Sample

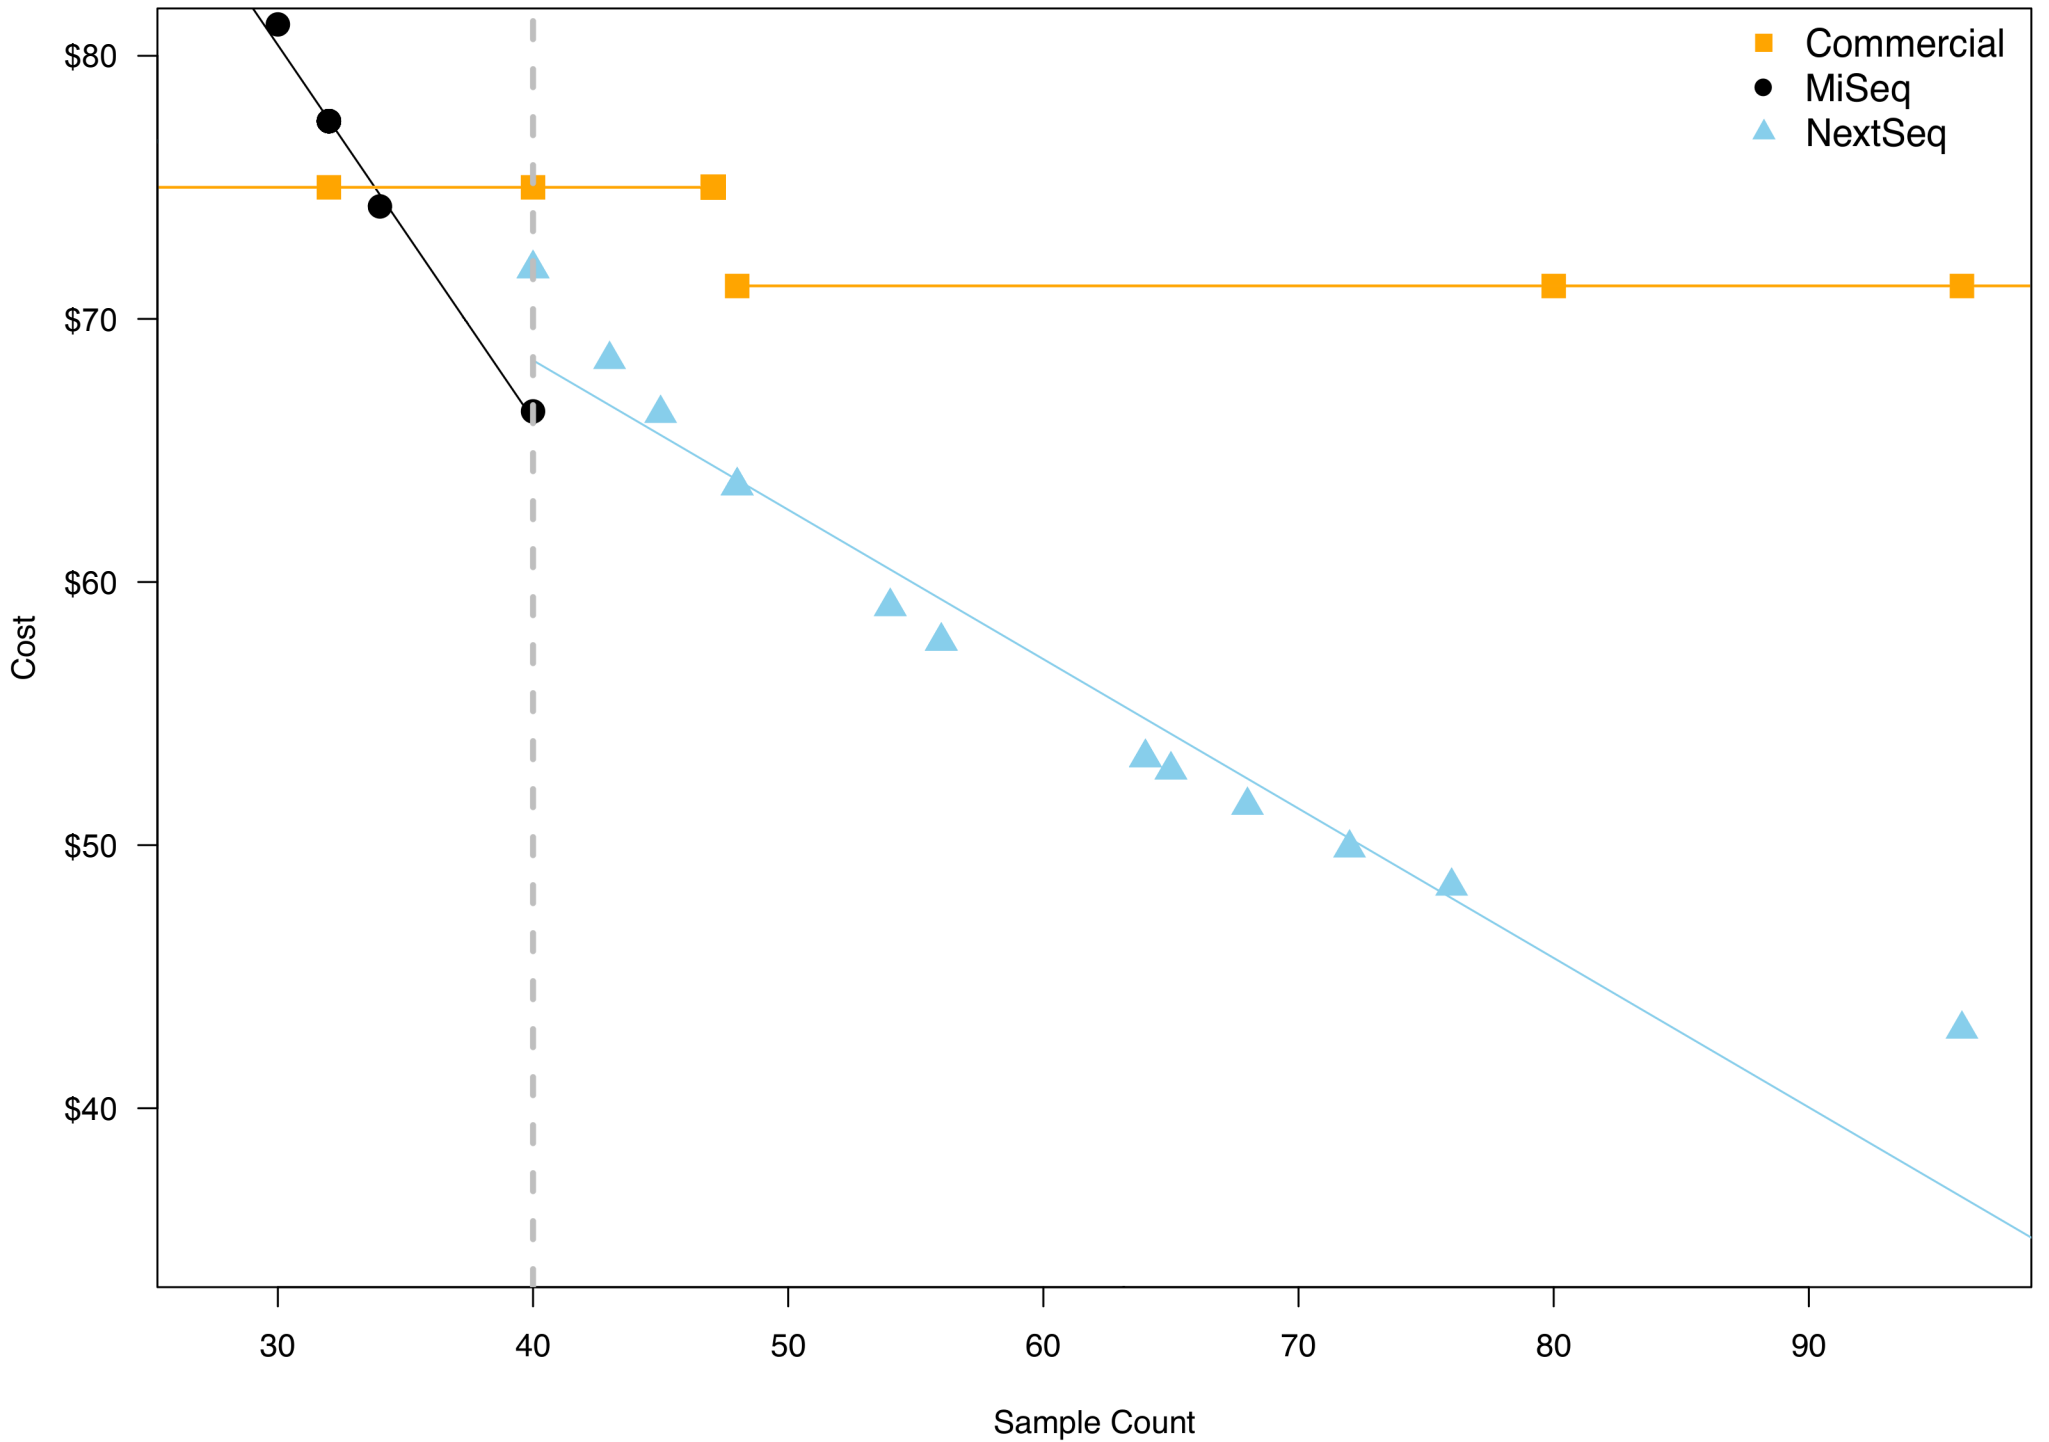



**Figure 1. EDS-HAT real-time genomic surveillance methods.** A) Biweekly collect list generation for all EDS-HAT organisms of interest obtained from patients admitted to the hospital for  $\geq 3$  days or had a previous hospital exposure in the prior 30 days, B1) Bacterial isolate collection from the UPMC Clinical Microbiology Laboratory, B2) Clinical stool specimen collection and *C. difficile* isolation using a Coy anaerobic chamber, C) Processing samples into pellets and glycerol stocks, D) DNA extraction, E) Library preparation using Eppendorf epMotion 5075, F) WGS using MiSeq or NextSeq550, G) Bioinformatic analysis to determine bacterial species and sequence type (ST), H) Determination of SNPs between isolates, and I) Determination of transmission clusters. The average turnaround time from MiGEL sample collection to determination of transmission clusters was 10 days.

**Figure 2. Maximum number of genomes that can be sequenced on the MiSeq v3 600 cycle flow cell and NextSeq550 v2.5 300 cycle flow cell based on size (Mb).** Sample counts were calculated using Illumina coverage calculator based on 80 $\times$  coverage criteria. Genome size of an average run by MiGEL is shown in comparison to individual organism sizes (red star).

**Figure 3. Whole genome sequencing cost per sample comparison between MiSeq, NextSeq550, and commercial laboratory.** Throughput cutoff between platforms is shown at  $N=40$  samples (gray dashed line). The commercial lab used by MiGEL offers a discount of 5% for orders  $\geq 48$  samples (as of December 2023). Data points represent instances of cost by sample count and lines of best fit are shown for each sequencing method.

**Supplementary Figure 1. EDS-HAT bioinformatics pipeline.**

Note, ST = sequence type; SNP = single nucleotide polymorphism; EHR = electronic health record).
