# Supplementary material for: Methods for cost-efficient, whole genome sequencing surveillance for enhanced detection of outbreaks in a hospital setting
Source: bioRxiv or medRxiv preprint supplement (doi:10.1101/2024.02.16.24302955), 2025-10-17
Supplement: Supplementary file [file media-1.pdf]

1

## Data Quality Control

- Assembly
  - Unicycler
- Annotation
  - Prokka
- ST Assignment
  - PubMLST
- Identify Species
  - Kraken2

2

## Quality Control Criteria

- Expected organism
- Expected genome size
- $\leq 350$  contigs
- $\geq 35\times$  depth

3

## SNP Calling

- SKA
  - for isolates with different STs.
- Snippy
  - for isolates with the same STs.

4

## Cluster Determination

- Interspecies SNPs  $\leq 15$
- *C. difficile* SNPs  $\leq 2$

5

## Epidemiological Links

- EHR Review
- Infection Prevention and Control Team Intervention
